# Supplementary material for: Meyer–Schuster-type rearrangement for the synthesis of α-selanyl-α,β-unsaturated thioesters
Source: Royal Society of Chemistry journal article supplement (doi:10.1039/d0cc07019j), 2020-11-25
Supplement: d0cc07019j1.pdf [file d0cc07019j1.pdf]

## Meyer–Schuster-type Rearrangement for the Synthesis of $\alpha$ -Selenyl- $\alpha,\beta$ -Unsaturated Thioesters

Lucas L. Baldassari,<sup>§</sup> Anderson C. Mantovani,<sup>§</sup> Micaela Jardim,<sup>§</sup> Boris Maryasin,<sup>\*,†,‡</sup> and Diogo S. Lüdtkke<sup>\*,§</sup>

<sup>§</sup> Instituto de Química, Universidade Federal do Rio Grande do Sul, UFRGS, Av. Bento Gonçalves 9500, 91501-970, Porto Alegre, RS, Brazil.

<sup>†</sup> Institute of Organic Chemistry, University of Vienna, Währingerstraße 38, 1090 Vienna, Austria.

<sup>‡</sup> Institute of Theoretical Chemistry, University of Vienna, Währingerstraße 17, 1090 Vienna, Austria

\* E-mail: [dsludtke@iq.ufrgs.br](mailto:dsludtke@iq.ufrgs.br)

\* E-mail: [boris.maryasin@univie.ac.at](mailto:boris.maryasin@univie.ac.at)

### Supporting Information - Computational details

The conformational space of all molecules has been initially searched using the OPLS\_2005 force field<sup>1</sup> and the systematic Monte Carlo conformers search routine implemented in MACROMODEL11.5.<sup>2</sup>

Accordingly, the structures located at force field level have then been subjected to B3LYP-D3/def2-SVP<sup>3–8</sup> (using def2-ECP<sup>9</sup> for iodine atom) geometry optimization. The nature of all stationary points (minima and transition states) was verified through the computation of the vibrational frequencies. The thermal corrections to the Gibbs free energy were combined with the single point energies calculated at the DLPNO-CCSD(T)/def2-TZVP<sup>10,11</sup> to yield Gibbs free energies (“ $G_{298}$ ”) at 298.15 K. All energies are reported in kcal mol<sup>-1</sup>.

The density-based solvation model SMD<sup>12</sup> was applied to consider solvent (DCM) effects for both geometries and energies. Solvation factors (for the Gibbs free energies at the DLPNO-CCSD(T)//DFT level of theory) have been calculated by single point energies in gas phase of the optimized geometries in solution. Free energies in solution have been corrected to a reference state of 1 mol l<sup>-1</sup> at 298.15 K through addition of  $RT\ln(24.46) = +7.925$  kJ mol<sup>-1</sup> to the gas phase (1 atm) free energies.

The DFT calculations have been performed with the Gaussian16 program package.<sup>13</sup> The ORCA 4.0.1 software was applied for the DLPNO-CCSD(T) computations.<sup>14</sup>

### References

- (1) Banks, J. L.; Beard, H. S.; Cao, Y.; Cho, A. E.; Damm, W.; Farid, R.; Felts, A. K.; Halgren, T. A.; Mainz, D. T.; Maple, J. R.; et al. Integrated Modeling Program, Applied Chemical Theory (IMPACT). *J. Comput. Chem.* **2005**, 26 (16), 1752–1780.

- (2) MacroModel, Schrödinger, LLC, New York, NY, 2018.
- (3) Becke, A. Density Functional Thermochemistry III The Role of Exact Exchange. *J. Chem. Phys.* **1993**, *98*, 5648–5652.
- (4) Lee, C.; Yang, W.; Parr, R. G. Development of the Colle-Salvetti Correlation-Energy Formula into a Functional of the Electron Density. *Phys. Rev. B* **1988**, *37* (2), 785–789.
- (5) Vosko, S. H.; Wilk, L.; Nusair, M. Accurate Spin-Dependent Electron Liquid Correlation Energies for Local Spin Density Calculations: A Critical Analysis. *Can. J. Phys.* **1980**, *58* (8), 1200–1211.
- (6) Stephens, P. J.; Devlin, F. J.; Chabalowski, C. F.; Frisch, M. J. Ab Initio Calculation of Vibrational Absorption and Circular Dichroism Spectra Using Density Functional Force Fields. *J. Phys. Chem.* **1994**, *98* (45), 11623–11627.
- (7) Grimme, S.; Antony, J.; Ehrlich, S.; Krieg, H. A Consistent and Accurate Ab Initio Parametrization of Density Functional Dispersion Correction (DFT-D) for the 94 Elements H–Pu. *J. Chem. Phys.* **2010**, *132* (15), 154104.
- (8) Weigend, F.; Ahlrichs, R. Balanced Basis Sets of Split Valence, Triple Zeta Valence and Quadruple Zeta Valence Quality for H to Rn: Design and Assessment of Accuracy. *Phys. Chem. Chem. Phys.* **2005**, *7* (18), 3297–3305.
- (9) Peterson, K. A.; Figgen, D.; Goll, E.; Stoll, H.; Dolg, M. Systematically Convergent Basis Sets with Relativistic Pseudopotentials. II. Small-Core Pseudopotentials and Correlation Consistent Basis Sets for the Post-*d* Group 16–18 Elements. *J. Chem. Phys.* **2003**, *119* (21), 11113–11123.
- (10) Riplinger, C.; Neese, F. An Efficient and near Linear Scaling Pair Natural Orbital Based Local Coupled Cluster Method. *J. Chem. Phys.* **2013**, *138* (3), 034106.
- (11) Riplinger, C.; Sandhoefer, B.; Hansen, A.; Neese, F. Natural Triple Excitations in Local Coupled Cluster Calculations with Pair Natural Orbitals. *J. Chem. Phys.* **2013**, *139* (13), 134101.
- (12) Marenich, A. V.; Cramer, C. J.; Truhlar, D. G. Universal Solvation Model Based on Solute Electron Density and on a Continuum Model of the Solvent Defined by the Bulk Dielectric Constant and Atomic Surface Tensions. *J. Phys. Chem. B* **2009**, *113* (18), 6378–6396.
- (13) Frisch, M. J.; Trucks, G. W.; Schlegel, H. B.; Scuseria, G. E.; Robb, M. A.; Cheeseman, J. R.; Scalmani, G.; Barone, V.; Mennucci, B.; Petersson, G. A.; et al. Gaussian 16, Revision A.03. Gaussian, Inc., Wallingford CT, 2016.
- (14) Neese, F. The ORCA Program System. *Wiley Interdiscip. Rev. Comput. Mol. Sci.* **2012**, *2* (1), 73–78.

## Coordinates of the most stable ( $\Delta G_{298,DCM}$ ) conformations as computed at the DLPNO-CCSD(T)/def2-TZVP//B3LYP-D3/def2-SVP level of theory

|                              |                             |
|------------------------------|-----------------------------|
| <b>A</b>                     | H 3.58915 -0.99736 -0.55433 |
| C 0.32973 -0.15373 0.00778   | H 2.20075 -1.28780 -1.65140 |
| C -0.87594 -0.34333 -0.01184 | C 2.15042 1.35436 -0.70600  |
| S -2.53692 -0.67387 -0.04489 | H 3.23936 1.50940 -0.65555  |
| C -3.24570 1.01761 0.04022   | H 1.84292 1.30359 -1.76054  |
| H -2.92906 1.61130 -0.82917  | H 1.65309 2.21181 -0.22817  |
| H -4.33821 0.88789 0.02217   | O 2.25751 0.24690 1.37453   |
| H -2.94669 1.51315 0.97485   | H 2.04721 -0.55648 1.87599  |
| C 1.79442 0.05888 0.03357    |                             |
| C 2.50013 -1.15282 -0.60079  | <b>PhSeI</b>                |
| H 2.25364 -2.07464 -0.04952  | Se 0.25107 1.34710 -0.05648 |

C -1.41604 0.38432 -0.01862  
C -2.00872 -0.03734 -1.22064  
C -2.05749 0.14641 1.20833  
C -3.24190 -0.69381 -1.19098  
H -1.50405 0.14598 -2.17192  
C -3.29206 -0.50866 1.22804  
H -1.59038 0.47107 2.14085  
C -3.88343 -0.92945 0.03106  
H -3.70340 -1.02263 -2.12575  
H -3.79267 -0.69262 2.18223  
H -4.84766 -1.44409 0.05042  
I 1.93018 -0.63072 0.03059

### A'

C -2.56392 -1.23076 0.23036  
C -2.72438 -0.24920 0.93935  
S -2.92850 1.09027 1.95479  
C -3.37371 2.39042 0.73908  
H -2.56440 2.51778 0.00891  
H -3.49847 3.31622 1.32014  
H -4.31706 2.13819 0.23436  
Se 0.67037 -0.37715 0.64246  
C 0.19050 1.21557 -0.33492  
C 0.43017 2.47640 0.23373  
C -0.43342 1.10669 -1.58782  
C 0.06108 3.62969 -0.46360  
H 0.90538 2.55327 1.21411  
C -0.80405 2.26695 -2.27440  
H -0.64899 0.12286 -2.00837  
C -0.55212 3.52643 -1.71838  
H 0.24897 4.61226 -0.02308  
H -1.29333 2.18378 -3.24826  
H -0.84076 4.43059 -2.26068  
C -2.33935 -2.41863 -0.62697  
C -2.05144 -3.63794 0.26716  
H -1.86169 -4.51305 -0.37334  
H -2.90031 -3.85731 0.93285  
H -1.15942 -3.45708 0.88757  
C -3.55861 -2.66495 -1.52315  
H -3.74785 -1.78587 -2.15742  
H -4.45520 -2.87003 -0.92015  
H -3.35774 -3.53005 -2.17404  
O -1.24169 -2.20409 -1.52078  
H -0.46493 -1.95880 -0.98430  
I 3.21261 -0.47840 0.10029

### TS<sub>A-B</sub>

C 1.79721 1.15323 -0.17059  
C 2.56781 0.16014 -0.27616

S 3.44246 -1.20751 -0.49677  
C 3.75269 -1.79914 1.21645  
H 2.79244 -1.95512 1.72427  
H 4.28570 -2.75453 1.10626  
H 4.37759 -1.07109 1.75104  
Se -0.38181 0.61135 -0.08786  
C -0.10465 -1.30510 -0.09781  
C 0.02837 -1.99818 1.11399  
C -0.02872 -1.99490 -1.31595  
C 0.24179 -3.38023 1.10349  
H -0.03623 -1.45780 2.06105  
C 0.18513 -3.37704 -1.31951  
H -0.13556 -1.45209 -2.25778  
C 0.32190 -4.07007 -0.11188  
H 0.34519 -3.91925 2.04896  
H 0.24509 -3.91306 -2.27039  
H 0.48870 -5.15045 -0.11713  
C 1.91995 2.66933 -0.00911  
C 2.13110 2.96373 1.47914  
H 2.19695 4.05399 1.61672  
H 3.05561 2.49488 1.84473  
H 1.28022 2.58607 2.06465  
C 3.08884 3.17146 -0.86604  
H 2.91423 2.94336 -1.92978  
H 3.17829 4.26230 -0.74865  
H 4.03379 2.69720 -0.56119  
O 0.72071 3.32838 -0.36985  
H 0.60172 3.25478 -1.33076  
I -3.26219 0.34205 0.08333

### B

C 1.47530 1.07592 0.04498  
C 1.32459 1.06006 -1.23327  
S 1.14812 1.13242 -2.84628  
C -0.35275 0.11647 -3.16977  
H -0.10951 -0.93869 -2.98976  
H -1.16842 0.45350 -2.51414  
H -0.58616 0.29233 -4.22950  
Se 2.50780 -0.58851 0.30746  
C 1.05359 -1.85347 0.38301  
C 0.89626 -2.75949 -0.67673  
C 0.19841 -1.88477 1.49327  
C -0.13442 -3.70165 -0.62209  
H 1.56698 -2.72441 -1.53826  
C -0.83207 -2.82777 1.53161  
H 0.31940 -1.15863 2.29763  
C -0.99838 -3.73403 0.47919  
H -0.26620 -4.40832 -1.44539  
H -1.51367 -2.84556 2.38526

H -1.80946 -4.46580 0.51365  
C 1.01402 2.01623 1.17471  
C 2.23021 2.43003 2.00129  
H 1.88672 3.08663 2.81484  
H 2.71410 1.54913 2.44839  
H 2.96330 2.97387 1.38729  
C 0.31225 3.23069 0.55736  
H 1.00375 3.80277 -0.07988  
H -0.55415 2.91722 -0.04357  
H -0.04532 3.88193 1.36879  
O 0.16353 1.28723 2.02626  
H -0.67765 1.09838 1.55384  
I -2.75074 0.54847 0.09747

### TS<sub>B-C</sub>

C -0.53991 1.18697 0.26944  
C -0.25850 0.04925 0.89805  
S -0.50586 -1.41165 1.57297  
C 0.18077 -2.60734 0.35564  
H -0.03377 -3.60250 0.77159  
H -0.32841 -2.46974 -0.60706  
H 1.26439 -2.44507 0.26476  
Se -2.08850 1.66948 -0.69836  
C -3.05811 0.00638 -0.47040  
C -3.96922 -0.12549 0.58501  
C -2.82804 -1.05266 -1.35874  
C -4.64534 -1.33769 0.75819  
H -4.14047 0.70508 1.27330  
C -3.50713 -2.26134 -1.17422  
H -2.11749 -0.93863 -2.18048  
C -4.41208 -2.40460 -0.11646  
H -5.35398 -1.44780 1.58301  
H -3.32616 -3.09258 -1.86039  
H -4.93971 -3.35127 0.02534  
C 0.68163 2.05357 0.48669  
C 1.41003 2.40949 -0.80032  
H 1.59146 1.51770 -1.41642  
H 2.37743 2.87654 -0.56031  
H 0.80546 3.12593 -1.37655  
C 0.39937 3.26290 1.36622  
H -0.08290 2.95312 2.30490  
H -0.26156 3.96870 0.84101  
H 1.34770 3.76954 1.60157  
O 1.41867 1.06938 1.29764  
H 2.15198 0.63877 0.77345  
I 3.81280 -0.75501 -0.34032

### C

C -0.61931 0.46014 -0.26064

C 0.50078 1.07871 0.14717  
S 1.33414 2.57964 -0.02228  
C 1.85286 2.85443 1.71696  
H 0.97562 2.90883 2.37684  
H 2.54021 2.06003 2.03946  
H 2.38336 3.81749 1.71977  
Se -2.09035 0.98387 -1.31604  
C -3.46070 0.04705 -0.30434  
C -4.07941 -1.07926 -0.86196  
C -3.83088 0.50611 0.96744  
C -5.06788 -1.75418 -0.13599  
H -3.78535 -1.43414 -1.85247  
C -4.81168 -0.18025 1.68962  
H -3.34950 1.38885 1.39461  
C -5.43032 -1.30938 1.13969  
H -5.55021 -2.63425 -0.56929  
H -5.09600 0.17176 2.68472  
H -6.19852 -1.84188 1.70632  
C -0.18404 -0.88206 0.30965  
C -0.91613 -1.41306 1.51288  
H -1.14056 -0.61145 2.22918  
H -0.31741 -2.19581 2.00248  
H -1.86392 -1.85717 1.17359  
C 0.25409 -1.91559 -0.69618  
H 0.79532 -2.73924 -0.20871  
H 0.87998 -1.47473 -1.48377  
H -0.65990 -2.31938 -1.16029  
O 1.08170 -0.07007 0.84122  
I 4.04089 -0.85860 -0.10410  
H 2.04741 -0.37439 0.49133

### TS<sub>C-D</sub>

C 0.60291 1.03182 0.54379  
C -0.60377 1.47011 0.13770  
S -1.27278 2.36011 -1.19902  
C -0.43472 1.52477 -2.59757  
H -0.70434 0.45961 -2.60677  
H -0.81973 2.01294 -3.50461  
H 0.65388 1.65766 -2.54072  
Se 2.36679 1.45186 0.01454  
C 3.00200 -0.35940 -0.28108  
C 4.28301 -0.70036 0.17287  
C 2.21951 -1.29744 -0.96959  
C 4.78157 -1.98594 -0.06801  
H 4.88833 0.02905 0.71722  
C 2.71915 -2.58472 -1.18735  
H 1.22384 -1.02794 -1.32922  
C 4.00056 -2.93069 -0.74152  
H 5.78204 -2.25038 0.28456

H 2.10424 -3.31799 -1.71578  
H 4.38889 -3.93686 -0.91854  
C 0.19193 0.30122 1.78650  
C -0.05120 -1.16076 1.71756  
H 0.95257 -1.61704 1.81806  
H -0.46534 -1.47152 0.75067  
H -0.67463 -1.51608 2.54979  
C 0.50993 0.90882 3.10155  
H 1.56630 0.64613 3.30079  
H -0.10366 0.48161 3.90679  
H 0.43545 2.00415 3.07707  
O -1.45357 1.08514 1.19256  
I -3.63816 -1.01379 -0.09784  
H -2.20801 0.46679 0.85643

### D

C -1.93730 -0.69355 0.34499  
C -0.51296 -1.02868 0.18878  
S 0.07624 -2.14575 -0.98632  
C -1.46165 -2.79385 -1.71811  
H -1.12703 -3.54062 -2.45256  
H -2.08005 -3.27459 -0.94897  
H -2.00945 -1.98829 -2.22629  
Se -2.40406 0.72699 -0.90216  
C -1.05671 2.01065 -0.35766  
C 0.07364 2.20617 -1.16240

C -1.20960 2.72137 0.84126  
C 1.05858 3.11449 -0.75974  
H 0.19673 1.63667 -2.08628  
C -0.21949 3.62521 1.23638  
H -2.09114 2.56090 1.46626  
C 0.91383 3.82157 0.43793  
H 1.94756 3.25680 -1.37900  
H -0.33280 4.17612 2.17377  
H 1.68904 4.52432 0.75391  
C -2.77996 -1.32400 1.19119  
C -4.22486 -0.95557 1.35108  
H -4.86056 -1.74329 0.90981  
H -4.48108 -0.90759 2.42236  
H -4.47900 0.00147 0.87628  
C -2.32192 -2.49265 2.02256  
H -2.96379 -3.36749 1.82208  
H -1.27636 -2.78401 1.84826  
H -2.43945 -2.25434 3.09336  
O 0.30552 -0.39749 0.94172  
I 3.45534 -0.60845 0.19296  
H 1.31841 -0.52118 0.72370
